# Supplementary material for: Nontargeted Screening for Flavonoids in Salicornia Plant by Reversed-Phase Liquid Chromatography–Electrospray Orbitrap Data-Dependent MS2/MS3
Source: MDPI journal article supplement (doi:10.3390/molecules28073022), 2023-03-28
Supplement: s1 [file s1]

## Supplementary Materials.

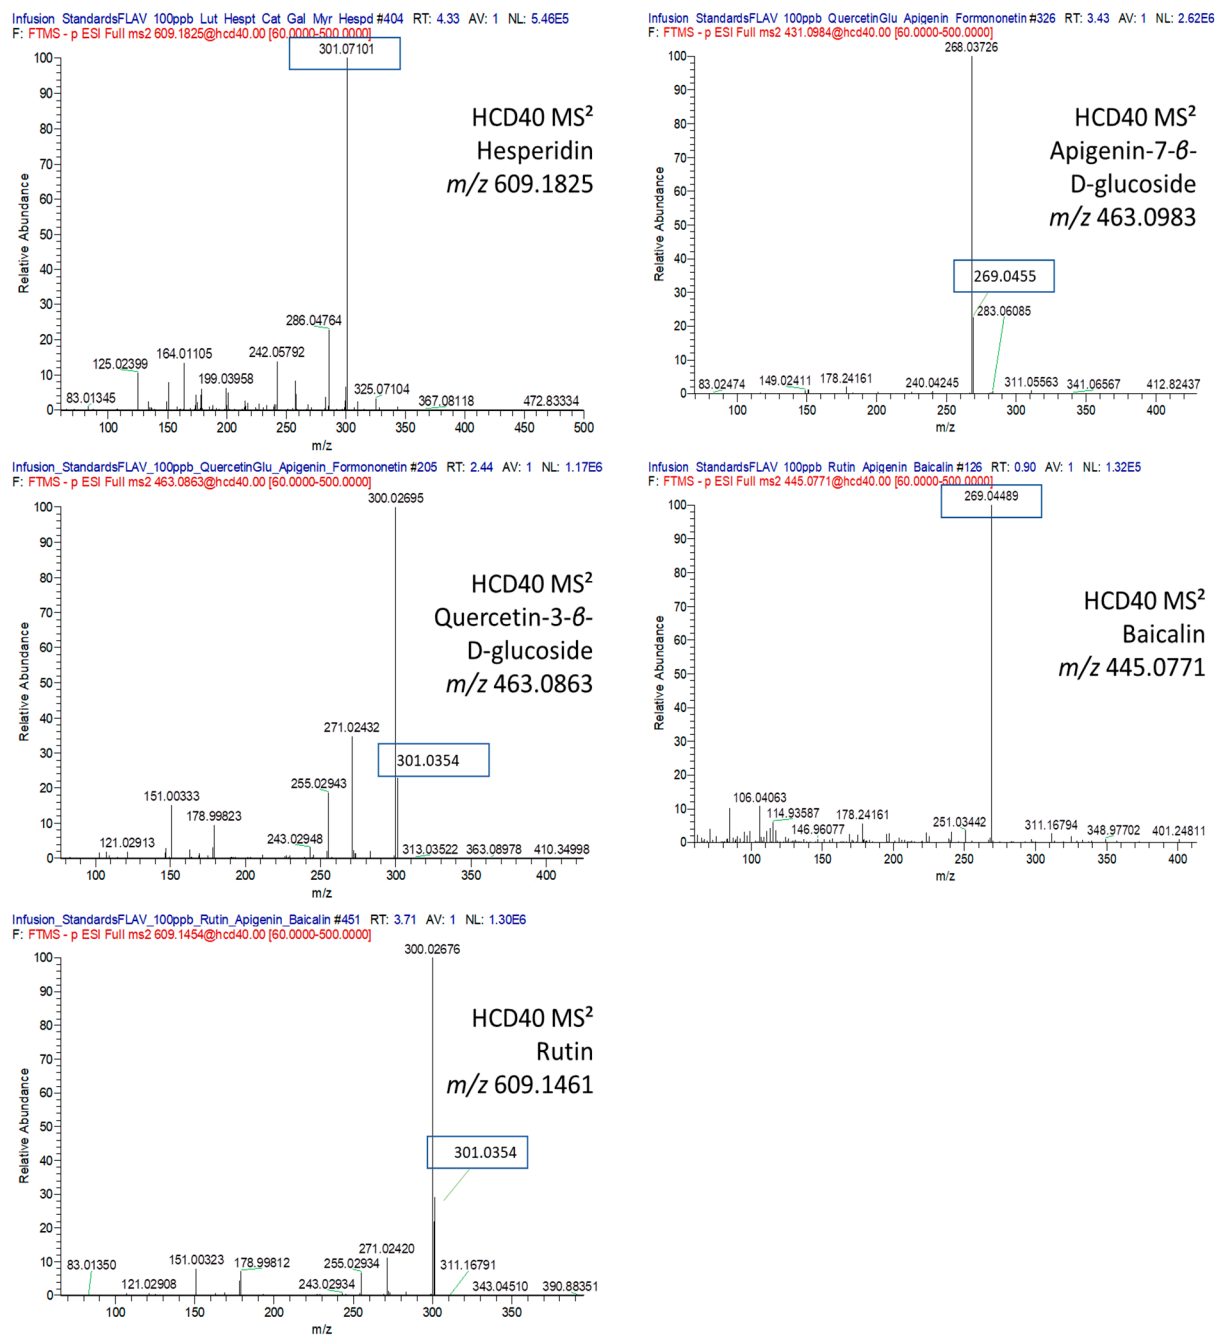

**Figure S1.** HCD40 and CID30 MS<sup>2</sup> spectra acquired after infusion of five glycosylated flavonoids, namely hesperidin, apigenin-7-β-D-glucoside, rutin, quercetin-3-β-D-glucoside and baicalin.

Infusion\_StandardsFLAV\_100ppb\_Lut\_Hespt\_Cat\_Gal\_Myr\_Hespd #376 RT: 4.10 AV: 1 NL: 8.61E5  
F: FTMS - p ESI Full ms2 609.1825@cid30.00 [60.0000-500.0000]

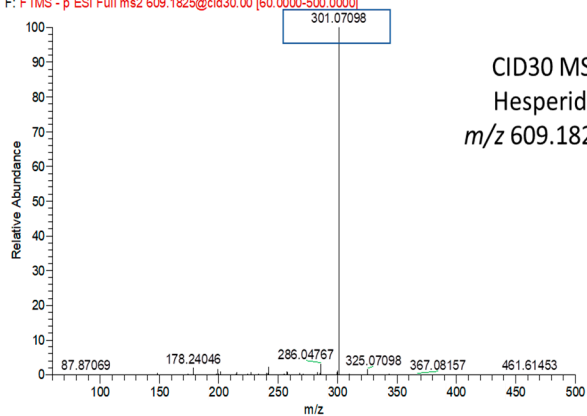

Infusion\_StandardsFLAV\_100ppb\_QuercetinGlu\_Apigenin\_Formononetin #311 RT: 3.31 AV: 1 NL: 2.48E6  
F: FTMS - p ESI Full ms2 431.0984@cid30.00 [60.0000-500.0000]

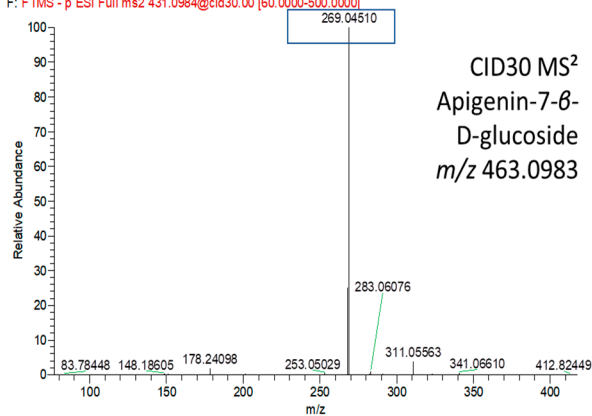

Infusion\_StandardsFLAV\_100ppb\_QuercetinGlu\_Apigenin\_Formononetin #283 RT: 3.08 AV: 1 NL: 1.41E6  
F: FTMS - p ESI Full ms2 463.0863@cid30.00 [60.0000-500.0000]

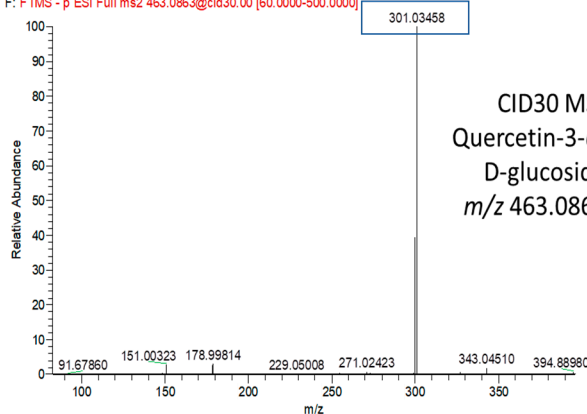

Infusion\_StandardsFLAV\_100ppb\_Rutin\_Apigenin\_Baicalin #189 RT: 1.78 AV: 1 NL: 1.39E5  
F: FTMS - p ESI Full ms2 445.0771@cid30.00 [60.0000-500.0000]

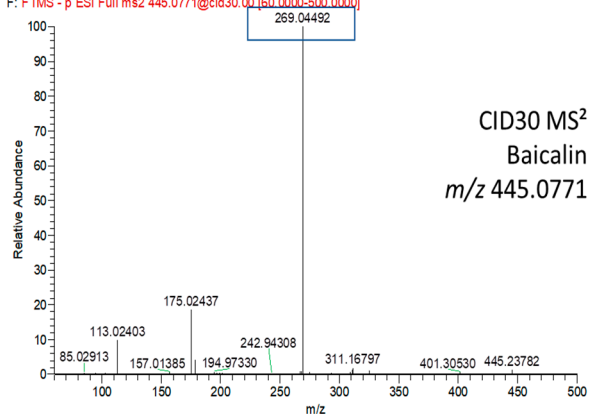

Infusion\_StandardsFLAV\_100ppb\_Rutin\_Apigenin\_Baicalin #406 RT: 3.38 AV: 1 NL: 6.34E5  
F: FTMS - p ESI Full ms2 609.1454@cid30.00 [60.0000-500.0000]

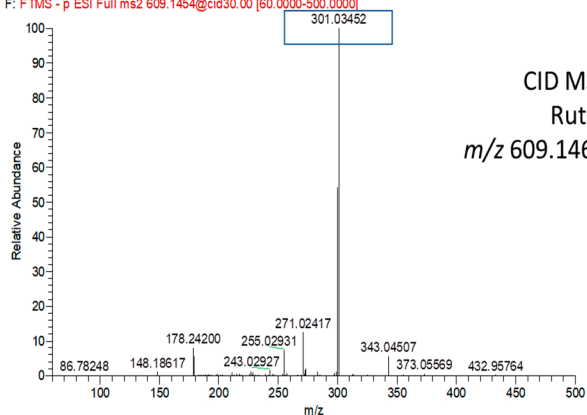

Figure S1. Cont.

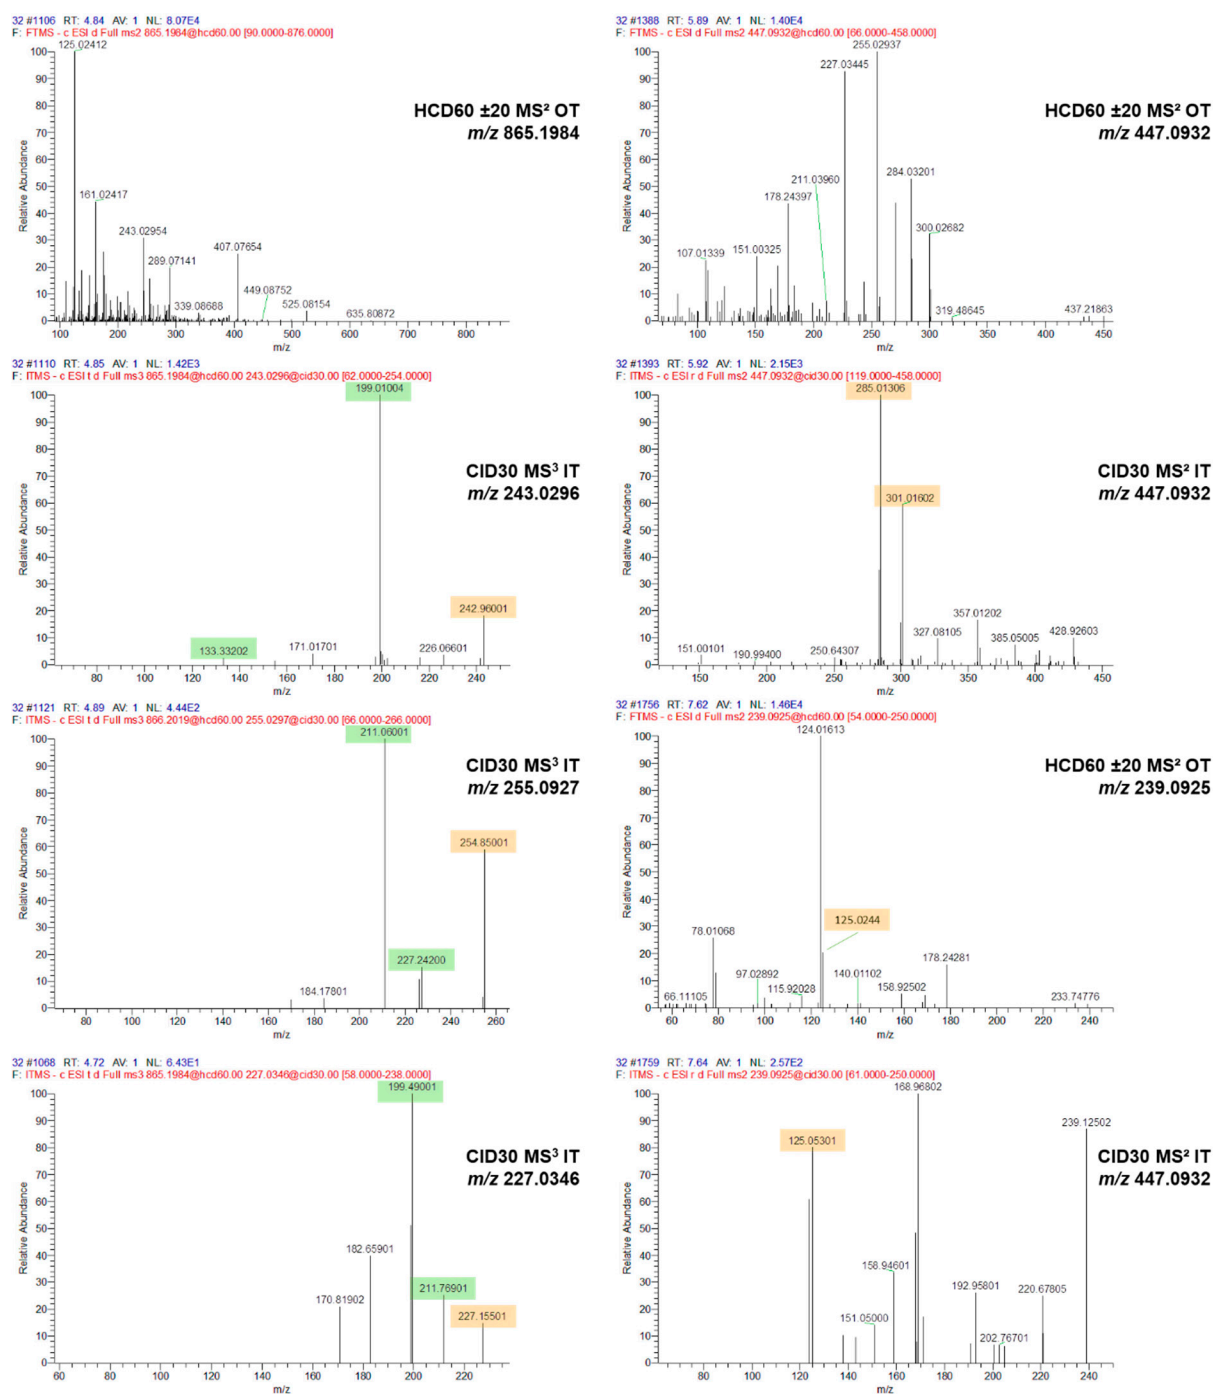

**Figure S2.** Fragmentation data acquired in HCD60 ±20 MS<sup>2</sup> orbitrap (OT) scans and CID30 MS<sup>2</sup>/MS<sup>3</sup> ion-trap (IT) scans after applying the non-targeted Top3 ddMS<sup>2</sup>/MS<sup>3</sup> method. Candidate-flavonoids lower than *m/z* 600 were fragmented in CID30 MS<sup>2</sup> IT scans whereas CID MS<sup>3</sup> scans were triggered for bigger compounds showing characteristic fragment ions in their prior HCD60 ±20 MS<sup>2</sup> scans. CID30 MS<sup>3</sup> scans were triggered on the biggest characteristic fragment ions detected in HCD60 ±20 MS<sup>2</sup> scans whereas CID30 MS<sup>2</sup> scans were applied on the precursor ions for detected flavonoids lower than *m/z* 600.

**Table S1.** Candidate-flavonoids detected in the model grape seed sample by the use of the non-targeted ddMS<sup>2</sup>/MS<sup>3</sup> method.

| Flavonoids                                   | Formula     | Monoisotopic mass<br>(Da) | mass error<br>(ppm) | [M-H] <sup>-</sup><br><i>m/z</i> | 10 mM NH <sub>4</sub> Ac<br>pH 5.4 | RT (min) | Nb of CFI<br>(/15) |
|----------------------------------------------|-------------|---------------------------|---------------------|----------------------------------|------------------------------------|----------|--------------------|
| Gentisic acid*                               | C7 H6 O4    | 154.02655                 | -0.39               | 153.0193                         | 3.76E+07                           | 1.958    | 4                  |
| 4-hydroxymandelic acid*                      | C8 H8 O4    | 168.04223                 | -0.14               | 167.0345                         | 1.47E+07                           | 1.679    | 3                  |
| <b>Gallic acid<sup>1</sup></b>               | C7 H6 O5    | 170.02144                 | -0.51               | 169.0142                         | 2.37E+08                           | 1.306    | 6                  |
| Vanillyl mandelic acid*                      | C9 H10 O5   | 198.05282                 | 0                   | 197.0455                         | 5.40E+07                           | 5.305    | 5                  |
| 3,4,5-trimethoxyhydrocinnamic acid*          | C12 H16 O5  | 240.09979                 | 0.07                | 239.0925                         | 5.62E+05                           | 7.592    | 4                  |
| <b>Epicatechin<sup>1</sup></b>               | C15 H14 O6  | 290.07905                 | 0.05                | 289.0720                         | 5.19E+07                           | 4.555    | 3                  |
| <b>Catechin<sup>1</sup></b>                  | C15 H14 O6  | 290.07905                 | 0.05                | 289.0720                         | 3.90E+07                           | 2.981    | 3                  |
| <b>Quercetin<sup>1</sup></b>                 | C15 H10 O7  | 302.04268                 | 0.08                | 301.0354                         | 1.75E+06                           | 6.746    | 11                 |
| <b>Gallic-acid-hexoside<sup>1</sup></b>      | C13 H16 O10 | 332.07438                 | 0.12                | 331.0671                         | 6.12E+07                           | 1.359    | 4                  |
| <b>Syringic acid hexoside<sup>1</sup></b>    | C15 H20 O10 | 360.1057                  | 0.14                | 359.0984                         | 1.23E+07                           | 4.506    | 2                  |
| Unknown                                      | C20 H24 O6  | 360.15733                 | 0.12                | 359.1501                         | 1.85E+06                           | 4.749    | 2                  |
| Unknown                                      | C21 H32 O10 | 444.1996                  | 0.12                | 443.1923                         | 3.45E+07                           | 2.476    | 9                  |
| <b>Quercetin-rhamnoside<sup>1</sup></b>      | C21 H20 O11 | 448.10048                 | -0.19               | 447.0932                         | 2.01E+06                           | 5.807    | 3                  |
| <b>Eriodictyol-hexoside<sup>1</sup></b>      | C21 H22 O11 | 450.11619                 | -0.04               | 449.1089                         | 1.13E+07                           | 4.703    | 4                  |
| <b>Catechin-hexoside<sup>1</sup></b>         | C21 H24 O11 | 452.13188                 | 0.04                | 451.1246                         | 6.72E+06                           | 2.922    | 3                  |
| <b>Quercetin-3-β-D-glucoside<sup>1</sup></b> | C21 H20 O12 | 464.09544                 | -0.07               | 463.0863                         | 6.43E+06                           | 5.519    | 10                 |
| <b>Isorhamnetin-hexoside<sup>1</sup></b>     | C22 H22 O12 | 478.11101                 | -0.25               | 477.1037                         | 9.51E+05                           | 5.869    | 2                  |
| Unknown                                      | C26 H36 O11 | 524.22572                 | -0.08               | 523.2184                         | 2.40E+07                           | 5.643    | 7                  |
| <b>Type B procyanidin<sup>1</sup></b>        | C30 H26 O12 | 578.14247                 | 0.08                | 577.1353                         | 3.42E+07                           | 3.908    | 10                 |
| <b>Type B procyanidin<sup>1</sup></b>        | C30 H26 O12 | 578.14247                 | 0.08                | 577.1353                         | 2.43E+07                           | 2.629    | 5                  |

Table S1. *Cont.*

| Flavonoids                            | Formula     | Monoisotopic mass<br>(Da) | mass error<br>(ppm) | [M-H] <sup>-</sup><br><i>m/z</i> | 10 mM NH <sub>4</sub> Ac<br>pH 5.4 | RT (min) | Nb of CFI<br>(/15) |
|---------------------------------------|-------------|---------------------------|---------------------|----------------------------------|------------------------------------|----------|--------------------|
| <b>Type B procyanidin<sup>1</sup></b> | C30 H26 O12 | 578.14247                 | 0.08                | 577.1353                         | 2.21E+07                           | 3.58     | 5                  |
| <b>Type B procyanidin<sup>1</sup></b> | C30 H26 O12 | 578.14247                 | 0.08                | 577.1353                         | 1.90E+07                           | 2.225    | 5                  |
| <b>Type B procyanidin<sup>1</sup></b> | C30 H26 O12 | 578.14247                 | 0.08                | 577.1353                         | 3.87E+06                           | 5.045    | 2                  |
| Catechin-di-hexoside*                 | C27 H34 O16 | 614.1844                  | -0.46               | 613.1771                         | 2.59E+06                           | 1.752    | 2                  |
| Catechin-di-hexoside*                 | C27 H34 O16 | 614.1844                  | -1.88               | 613.1771                         | 9.28E+05                           | 1.558    | 2                  |
| Unknown                               | C37 H30 O16 | 730.15346                 | 0.1                 | 729.1461                         | 1.23E+07                           | 5.033    | 10                 |
| Unknown                               | C37 H30 O16 | 730.15346                 | 0.1                 | 729.1461                         | 4.95E+06                           | 4.73     | 10                 |
| Unknown                               | C45 H38 O18 | 866.20576                 | -0.06               | 865.1985                         | 1.15E+07                           | 4.845    | 11                 |
| Unknown                               | C45 H38 O18 | 866.20576                 | -0.06               | 865.1985                         | 7.63E+06                           | 2.925    | 8                  |
| Unknown                               | C45 H38 O18 | 866.20576                 | -0.06               | 865.1985                         | 6.47E+06                           | 1.328    | 8                  |
| Unknown                               | C45 H38 O18 | 866.20576                 | -0.06               | 865.1985                         | 4.03E+06                           | 5.372    | 10                 |
| Cinnamtannin*                         | C60 H50 O24 | 1154.26814                | -0.92               | 1153.2610                        | 2.89E+06                           | 4.978    | 3                  |
| Cinnamtannin*                         | C60 H50 O24 | 1154.26814                | -0.92               | 1153.2610                        | 2.01E+06                           | 2.245    | 4                  |

Flavonoids<sup>1</sup> detected in targeted HCD30 MS<sup>2</sup> Analysis. Flavonoids\* detected with multiples matches with online and local databases.
